# Supplementary material for: In silico studies on the anti-acne potential of Garcinia mangostana xanthones and benzophenones
Source: publisher site journal article supplement (doi:10.1515/znc-2023-0118), 2024-03-01
Supplement: Supplementary file 1 [file j_znc-2023-0118_suppl_001.docx]

# *Supplementary material*

# *In silico* studies on the anti-acne potential of *Garcinia mangostana* xanthones and benzophenones

# Natalia Blicharska1, Ziyad Ben Ahmed2,3, Simon Jackson4, Dino Rotondo1, Veronique Seidel1*

# 1 Strathclyde Institute of Pharmacy & Biomedical Sciences, University of Strathclyde, Glasgow, UK

# 2 Laboratory of Fundamental Science, University Amar Telidji, Laghouat, Algeria

# 3 Department of Analytical Chemistry, Applied Chemometrics and Molecular Modelling, Vrije Universiteit Brussel (VUB), Brussels, Belgium

# 4 Botanical Research Department, Davines S.p.A. Via Don Angelo Calzolari 55/A, 43126 Parma, Italy

* Correspondence: Veronique Seidel ([veronique.seidel@strath.ac.uk](mailto:veronique.seidel@strath.ac.uk))


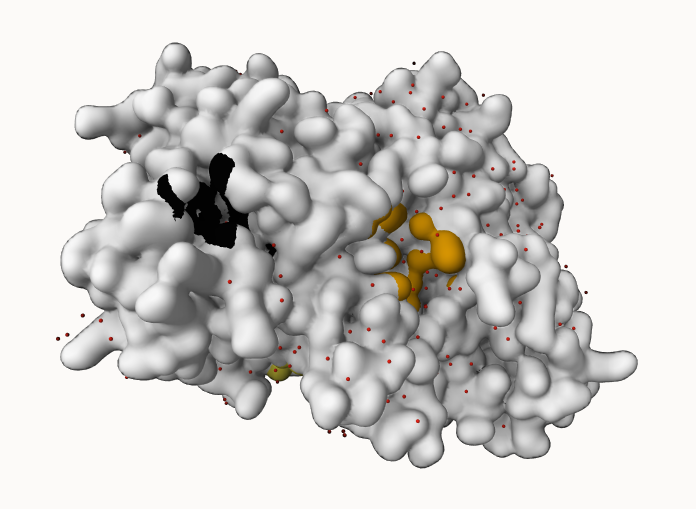


**Figure S1:** PrankWeb binding pocket predictions for *C. acnes* KAS III (PDBID: 6A9N) showing the most probable binding site (pocket 1 in black).


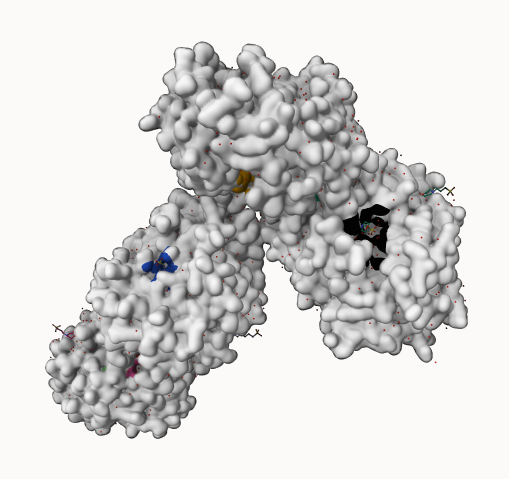


**Figure S2:** PrankWeb binding pocket predictions for *C. acnes* exo-β-1,4-mannosidase (PDB ID: 6GVB) showing the most probable binding site (pocket 1 in black).

**Table S1:** PrankWeb binding pocket predictions for *C. acnes* KAS III (PDBID: 6A9N)

|  | **Rank** | **Score** | **Probability** | **center_x** | **center_y** | **center_z** | **Residues** |
| --- | --- | --- | --- | --- | --- | --- | --- |
| **Pocket1** | 1 | 32.13 | 0.928 | -8.6105 | 22.3827 | 173.0191 | A_97 B_121 B_122 B_152 B_162 B_165 B_166 B_167 B_199 B_201 B_218 B_220 B_222 B_223 B_225 B_257 B_259 B_260 B_262 B_263 B_288 B_290 B_318 B_319 B_320 B_42 B_46 B_47 B_91 |
| **Pocket2** | 2 | 31.96 | 0.927 | 24.3462 | 11.0911 | 187.5195 | A_121 A_122 A_152 A_162 A_163 A_165 A_166 A_167 A_199 A_201 A_218 A_220 A_222 A_223 A_225 A_226 A_257 A_259 A_260 A_262 A_263 A_288 A_290 A_318 A_319 A_320 A_42 A_46 A_47 A_91 B_97 |
| **Pocket3** | 3 | 5.38 | 0.268 | 11.305 | 11.5933 | 170.8886 | A_200 A_203 A_205 B_100 B_103 B_107 B_151 B_154 B_215 B_60 B_61 B_62 B_92 B_93 B_94 B_95 |
| **Pocket4** | 4 | 3.64 | 0.143 | 0.8731 | 14.3791 | 189.5589 | A_103 A_151 A_60 A_61 A_62 A_92 A_93 A_94 A_95 B_197 B_200 B_203 |
| **Pocket5** | 5 | 2.78 | 0.086 | 9.3687 | 17.604 | 179.3474 | A_117 A_119 A_90 A_91 A_93 A_96 B_117 B_119 B_90 B_91 B_93 B_95 B_96 |
| **Pocket6** | 6 | 2.46 | 0.067 | 7.1721 | 17.0983 | 181.6081 | A_117 A_119 A_204 A_90 A_91 A_93 A_94 A_95 A_96 B_117 B_119 B_204 B_90 B_91 B_93 B_94 B_95 B_96 |

**Table S2:** PrankWeb binding pocket predictions for *C. acnes* exo-β-1,4-mannosidase (PDB ID: 6GVB)

|  | **Rank** | **Score** | **Probability** | **center_x** | **center_y** | **center_z** | **Residues** |
| --- | --- | --- | --- | --- | --- | --- | --- |
| **Pocket1** | 1 | 19.85 | 0.836 | 20.7606 | 8.3728 | -67.607 | A_139 A_140 A_150 A_151 A_189 A_190 A_191 A_217 A_219 A_220 A_259 A_295 A_308 A_311 A_86 A_88 A_89 B_100 |
| **Pocket2** | 2 | 19.36 | 0.83 | -21.6253 | 6.1059 | 18.1923 | C_100 D_139 D_140 D_150 D_151 D_189 D_190 D_217 D_219 D_220 D_259 D_295 D_308 D_310 D_311 D_86 D_88 D_89 |
| **Pocket3** | 3 | 18.53 | 0.819 | -2.1402 | 6.4255 | -11.2079 | C_139 C_140 C_143 C_151 C_189 C_190 C_191 C_195 C_215 C_217 C_219 C_220 C_221 C_259 C_295 C_308 C_310 C_311 C_314 C_86 C_88 C_89 D_100 |
| **Pocket4** | 4 | 18.18 | 0.813 | 39.9409 | 8.0849 | -38.1665 | A_100 B_139 B_140 B_150 B_151 B_189 B_190 B_191 B_217 B_219 B_220 B_259 B_295 B_308 B_310 B_311 B_314 B_86 B_88 B_89 |
| **Pocket5** | 5 | 7.51 | 0.436 | -12.0148 | -4.6444 | 3.3394 | C_18 C_45 C_47 C_48 C_51 C_92 C_93 C_95 D_18 D_45 D_47 D_48 D_51 D_92 D_93 D_95 |
| **Pocket6** | 6 | 7.43 | 0.43 | 30.3127 | 18.8923 | -52.9616 | A_15 A_18 A_45 A_47 A_48 A_51 A_92 A_93 A_95 B_18 B_45 B_47 B_48 B_51 B_92 B_93 B_95 |
| **Pocket7** | 7 | 4.46 | 0.203 | -38.0995 | -5.7097 | 15.7604 | D_133 D_183 D_185 D_2 D_211 D_254 D_256 D_290 D_291 D_39 D_77 D_79 |
| **Pocket8** | 8 | 3.68 | 0.146 | 56.5379 | 20.3578 | -40.3313 | B_133 B_183 B_185 B_2 B_211 B_254 B_256 B_290 B_291 B_39 B_77 B_79 |
| **Pocket9** | 9 | 3.52 | 0.134 | -21.0116 | -12.0646 | 13.1507 | D_14 D_16 D_17 D_20 D_25 D_28 D_43 D_67 D_7 D_9 |
| **Pocket10** | 10 | 3.51 | 0.133 | 21.3093 | 26.3283 | -62.4867 | A_14 A_16 A_17 A_20 A_21 A_25 A_28 A_43 A_7 A_9 |
| **Pocket11** | 11 | 3.44 | 0.129 | 4.0367 | 19.8945 | -65.2234 | A_133 A_183 A_185 A_2 A_211 A_254 A_256 A_290 A_291 A_39 A_77 A_79 |
| **Pocket12** | 12 | 3.1 | 0.106 | 14.9593 | -5.8468 | -8.2749 | C_183 C_185 C_2 C_211 C_254 C_256 C_290 C_291 C_39 C_77 C_79 |
| **Pocket13** | 13 | 3.1 | 0.106 | -3.6061 | -12.6609 | -6.3383 | C_16 C_17 C_20 C_25 C_28 C_7 C_9 |
| **Pocket14** | 14 | 2.77 | 0.085 | 39.2817 | 26.0627 | -43.0383 | B_14 B_16 B_17 B_20 B_21 B_25 B_43 B_7 B_9 |
| **Pocket15** | 15 | 1.93 | 0.039 | 36.8196 | 25.2722 | -51.0766 | A_18 B_17 B_45 B_48 B_57 B_60 B_63 |
| **Pocket16** | 16 | 1.81 | 0.033 | -5.8133 | -11.2131 | 1.77 | C_17 C_44 C_45 C_48 C_49 C_57 C_60 C_63 D_18 |
| **Pocket17** | 17 | 1.14 | 0.01 | -19.1676 | -10.6293 | 5.4972 | D_17 D_45 D_48 D_57 D_60 D_63 |

**Table S3:** Docking scores (kcal/mol) and SILE values of *G. mangostana* xanthones/benzophenones and control ligands against JNK1, *C. acnes* KAS III and exo-β-1,4-mannosidase

|  | JNK1 | | KAS III | | Exo-β-1,4-mannosidase | |
| --- | --- | --- | --- | --- | --- | --- |
| Ligand | Score | SILE | Score | SILE | Score | SILE |
| Quercetagetin (control) | -11.0 | 4.3 |  |  |  |  |
| Phloretin (control) | -9.7 | 3.9 | -7.8 | 3.2 |  |  |
| α-mangostin | -10.3 | 3.7 | 1.5 | 0.5 | -9.8 | 3.5 |
| β-mangostin | -9.8 | 3.5 | 3.5 | 1.2 | -10.0 | 3.6 |
| γ-mangostin | -10.1 | 3.7 | -1.3 | 0.5 | -10.8 | 3.9 |
| 6-deoxy-γ-mangostin | -10.4 | 3.8 | -2.6 | 1.0 | -10.6 | 3.9 |
| Gentisein | -9.4 | 3.9 | -**8.9** | **3.7** | -8.8 | 3.7 |
| 1,3,7-trihydroxy-2-(3-methyl-2-butenyl)-8-(3-hydroxy-3-methylbutyl)-xanthone | -10.4 | 3.8 | -0.5 | 0.2 | -10.6 | 3.9 |
| Norathyriol | -9.6 | 4.0 | -8.7 | 3.6 | -9.1 | 3.8 |
| 1,3,6,7-Tetrahydroxy-8- (3-methyl-2-butenyl)-9H-xanthon-9-one | -11.1 | 4.3 | -7.0 | 2.7 | -10.8 | 4.2 |
| 1-Isomangostin | -9.7 | 3.5 | 9.6 | 3.5 | -10.7 | 3.9 |
| 1-Isomangostin hydrate | -9.9 | 3.5 | 11.8 | 4.2 | -9.6 | 3.4 |
| 3-Isomangostin | -9.8 | 3.5 | 5.2 | 1.9 | -10.3 | 3.7 |
| 3-Isomangostin hydrate | -11.0 | 3.9 | 3.2 | 1.1 | -10.5 | 3.7 |
| 1,7-Dihydroxy-2-(3- methylbut-2-enyl)-3- methoxyxanthone | -9.0 | 3.5 | -6.4 | 2.5 | -10.2 | 3.9 |
| Calocalabaxanthone | -10.0 | 3.6 | 0.4 | 0.1 | -9.8 | 3.6 |
| Calabaxanthone | -9.8 | 3.6 | -1.0 | 0.4 | -11.0 | 4.0 |
| Demethylcalabaxanthone | -10.8 | 4.0 | -1.2 | 0.4 | -11.3 | 4.2 |
| 9-hydroxycalabaxanthone | -10.4 | 3.7 | -0.9 | 0.3 | -10.9 | 3.9 |
| Padiaxanthone | -11.3 | 4.1 | -3.6 | 1.3 | -10.7 | 3.9 |
| Thwaitesixanthone | -10.8 | 4.0 | -3.1 | 1.1 | -10.5 | 3.9 |
| BR-Xanthone A | -11.2 | 4.1 | -2.0 | 0.7 | -10.9 | 4.0 |
| BR- Xanthone B | -9.8 | 4.0 | -6.9 | 2.8 | -8.8 | 3.6 |
| 2-isoprenyl-1,7-dihydroxy-3-methoxy xanthone | -9.0 | 3.5 | -6.4 | 2.5 | -10.2 | 3.9 |
| Garcimangostanol | -9.1 | 3.5 | -4.7 | 1.8 | -9.3 | 3.5 |
| Cudraxanthone | -9.1 | 3.5 | -4.2 | 1.6 | -9.6 | 3.7 |
| Cudraxanthone G | -9.1 | 3.3 | -3.6 | 1.3 | -9.9 | 3.6 |
| 8-hydroxycudraxanthone G | -9.4 | 3.4 | 9.9 | 3.6 | -10.3 | 3.7 |
| Gartanin | -10.7 | 3.9 | -1.4 | 0.5 | -11.1 | 4.0 |
| 8-Deoxygartanin | -10.5 | 3.9 | -2.0 | 0.7 | -10.9 | 4.0 |
| Garcinone A | -9.7 | 3.6 | 5.5 | 2.0 | -10.7 | 3.9 |
| Garcinone B | -10.9 | 4.0 | -4.2 | 1.5 | -10.6 | 3.9 |
| Garcinone C | -10.8 | 3.9 | 0.5 | 0.2 | -11.0 | 4.0 |
| Garcinone D | -11.1 | 4.0 | 1.2 | 0.4 | -10.7 | 3.8 |
| Garcinone E | -9.9 | 3.4 | 8.7 | 3.0 | -11.1 | 3.9 |
| 7-*O*-methylgarcinone E | -10.5 | 3.6 | 8.8 | 3.0 | -10.3 | 3.5 |
| Fuscaxanthone C | -10.1 | 3.6 | 11.2 | 4.0 | -9.9 | 3.5 |
| Mangostanate | -11.4 | 4.0 | 10.0 | 3.5 | -10.6 | 3.7 |
| Mangostingone | -10.4 | 3.7 | 4.5 | 1.6 | -10.2 | 3.6 |
| Mangosharin | -10.1 | 3.9 | -6.6 | 2.5 | -10.7 | 4.1 |
| 6-methoxy-bis pyrano xanthone | -9.9 | 3.6 | -2.2 | 0.8 | -10.2 | 3.7 |
| Mangostenone A | -10.1 | 3.5 | 5.6 | 1.9 | -11.0 | 3.8 |
| Mangostenone B | -10.1 | 3.5 | 4.0 | 1.4 | -11.4 | 4.0 |
| Mangostenone D | -10.3 | 3.8 | 0.0 | 0.0 | -9.6 | 3.5 |
| Tovophyllin A | -10.0 | 3.5 | 1.4 | 0.5 | -11.2 | 3.9 |
| Tovophyllin B | -10.2 | 3.5 | 15.2 | 5.3 | -11.2 | 3.9 |
| 1,3,6-trihydroxy-2,5-bis(3-methylbut-2-enyl)-6',6'-dimethyl-4',5'-dihydropyrano[2',3':7,8] xanthone | -11.0 | 3.8 | 9.7 | 3.4 | -10.7 | 3.7 |
| Mangostinone | -10.1 | 3.7 | -2.0 | 0.7 | -9.3 | 3.4 |
| Smeathxanthone A | -10.3 | 3.8 | -1.1 | 0.4 | -9.3 | 3.4 |
| Trapezifolixanthone | -11.1 | 4.1 | 1.3 | 0.5 | -10.0 | 3.7 |
| Garcimangostin A | -10.2 | 3.7 | 1.9 | 0.7 | -9.9 | 3.6 |
| 1,4,6-trihydroxy-5-methoxy-7-(3-methylbut-2-enyl) xanthone | -10.3 | 3.9 | -1.2 | 0.5 | -9.3 | 3.5 |
| 1,5,8-trihydroxy-3-methoxy-2-(3-methyl-2-butenyl) xanthone | -9.8 | 3.7 | -0.7 | 0.3 | -9.5 | 3.6 |
| 2,7-di-(3-methylbut-2-enyl)-1,3,8-trihydroxy-4-methyl-xanthone | -9.8 | 3.6 | ₋4.8 | 1.7 | -10.5 | 3.8 |
| Parvifolixanthone C | -11.1 | 3.8 | 7.9 | 2.7 | -10.5 | 3.6 |
| Rubraxanthone | -9.9 | 3.6 | 4.9 | 1.8 | -10.6 | 3.8 |
| 2,8-di-(3-methylbut-2-enyl)-7-carboxy-1,3-dihydroxyxanthone | -10.3 | 3.7 | 6.4 | 2.3 | -11.4 | 4.1 |
| Garcixanthone A | -10.3 | 3.7 | 7.8 | 2.8 | -11.6 | 4.1 |
| Garcixanthone B | -10.4 | 3.8 | ₋2.1 | 0.8 | -10.5 | 3.9 |
| Garcixanthone C | -10.6 | 3.8 | 1.9 | 0.7 | -12.0 | 4.3 |
| Garcixanthone D | -10.7 | 3.9 | 0.1 | 0.0 | -11.1 | 4.0 |
| 1,3,8-trihydroxy-2-(3-methyl-2-butenyl)-4-(3-hydroxy-3-methylbutanoyl)-xanthone | -10.1 | 3.6 | 0.7 | 0.3 | -11.6 | 4.2 |
| Allanxanthone A | -10.2 | 3.8 | -1.5 | 0.6 | -10.7 | 3.9 |
| 5-*O*-methylxanthone V1 | -10.9 | 3.9 | 4.4 | 1.6 | -9.7 | 3.5 |
| Garcimangosxanthone A | -9.4 | 3.5 | -1.7 | 0.6 | -10.2 | 3.8 |
| Garcimangosxanthone B | -9.8 | 3.5 | -4.8 | 1.7 | -10.0 | 3.6 |
| Garcimangosxanthone C | -9.6 | 3.7 | -4.1 | 1.6 | -9.8 | 3.7 |
| Garcimangosxanthone D | -11.0 | 4.0 | -3.7 | 1.3 | -10.4 | 3.8 |
| Garcimangosxanthone E | -11.2 | 4.0 | 10.2 | 3.6 | -11.2 | 4.0 |
| Garcimangosxanthone F | -10.1 | 3.5 | 12.3 | 4.2 | -11.4 | 3.9 |
| Garcimangosxanthone G | -10.5 | 3.6 | 13.8 | 4.7 | -11.1 | 3.8 |
| Garcimangosxanthone H | -10.8 | 3.9 | 0.0 | 0.0 | -11.4 | 4.1 |
| 1,6-dihydroxy-7-methoxy-8-(3-methylbut-3-enyl)-6',6'-dimethyl-4',5'-dihydropyrano[2',3':3,2] xanthone | -10.3 | 3.7 | 0.0 | 0.0 | -10.3 | 3.7 |
| Garcinoxanthone A | -6.5 | 1.9 | 130 | 37.9 | -9.2 | 2.7 |
| Garcinoxanthone B | -5.2 | 1.5 | 133.3 | 38.8 | -8.8 | 2.6 |
| Garcinoxanthone C | -8.0 | 2.3 | 87.8 | 25.7 | -11.3 | 3.3 |
| Garcinoxanthone D | -10.6 | 3.7 | 7.1 | 2.5 | -11.3 | 4.0 |
| Garcinoxanthone E | -10.2 | 3.6 | 5.9 | 2.1 | -10.6 | 3.7 |
| Garcinoxanthone F | -9.9 | 3.5 | 9.0 | 3.2 | -10.0 | 3.5 |
| Garcinoxanthone G | -10.2 | 3.7 | ₋0.9 | 0.3 | -10.0 | 3.6 |
| Garcinoxanthone S | ₋9.9 | 3.5 | 15.1 | 5.3 | -10.7 | 3.8 |
| Garcinoxanthone T | -**11.5** | **4.4** | -5.9 | 2.2 | -10.4 | 4.0 |
| Garcinoxanthone U | -11.6 | 4.1 | 1.3 | 0.5 | -10.8 | 3.9 |
| Garcinoxanthone V | -10.9 | 3.9 | 2.6 | 0.9 | -10.6 | 3.7 |
| Cratoxyxanthone | -2.0 | 0.6 | 147 | 42.8 | -9.5 | 2.8 |
| Mangostanaxanthone I | -8.8 | 2.9 | 46.1 | 15.2 | -9.7 | 3.2 |
| Mangostanaxanthone II | -10.2 | 3.5 | 11.7 | 4.0 | -11.1 | 3.8 |
| Mangostanaxanthone III | -10.2 | 3.6 | 4.4 | 1.6 | -9.8 | 3.5 |
| Mangostanaxanthone IV | -10.6 | 3.8 | 3.0 | 1.1 | -9.9 | 3.5 |
| Mangostanaxanthone V | -9.9 | 3.4 | 13.6 | 4.6 | -11.4 | 3.9 |
| Mangostanaxanthone VI | -11.4 | 3.9 | 5.8 | 2.0 | -**13.2** | **4.5** |
| Mangostanaxanthone VII | -10.3 | 3.7 | 2.8 | 1.0 | -10.1 | 3.6 |
| Mangostanaxanthone VIII | -10.3 | 3.6 | 4.4 | 1.6 | -10.2 | 3.6 |
| Mangostanaxanthone VIIII | -10.7 | 3.8 | 4.6 | 1.6 | -10.9 | 3.9 |
| Garcimangosone A | -11.3 | 3.9 | 7.1 | 2.5 | -10.1 | 3.5 |
| Garcimangosone B | -9.8 | 3.5 | 0.5 | 0.2 | -11.1 | 4.0 |
| 7-*O*-demethyl mangostanin | -10.6 | 3.9 | -1.9 | 0.7 | -11.8 | 4.3 |
| 1,5-dihydroxy-2-isopentyl 3-methoxy xanthone | -9.7 | 3.7 | -6.7 | 2.6 | -9.4 | 3.6 |
| 1,7-dihydroxy-2-isopentyl 3-methoxy xanthone | -10.0 | 3.9 | -8.6 | 3.3 | -9.5 | 3.7 |
| Garcimangosone D | -8.9 | 3.3 | 8.9 | 3.3 | -10.0 | 3.7 |
| 3,4,5,3'-tetrahydroxybenzophenone | -9.5 | 4.0 | -8.3 | 3.5 | -8.6 | 3.6 |
| 4,6,3',4'-tetrahydroxy-2-methoxybenzophenone | -9.0 | 3.7 | -6.8 | 2.8 | -9.0 | 3.7 |
| 2,4,6,3',5'-pentahydroxybenzophenone | -9.8 | 4.1 | -**8.6** | **3.6** | -8.8 | 3.6 |
| Rhodanthenone B | -8.5 | 3.1 | -1.3 | 0.5 | -9.8 | 3.5 |
| GM-2 | -10.0 | 4.1 | -7.9 | 3.2 | -9.0 | 3.7 |
| 2,4,3'-trihydroxybenzophenone-6-*O*-β-glucopyranoside | -8.8 | 3.2 | 1.0 | 0.4 | -9.9 | 3.6 |

**Table S4:** Characteristics (distances and angles) of conventional hydrogen bondings between garcinoxanthone T and JNK1, gentisein/2,4,6,3’,5’-pentahydroxybenzophenoneand *C. acnes* KAS III, and mangostanaxanthone VI and *C. acnes* exo-β-1,4-mannosidase.

| **Interacting residues** | **Distance (Å)** | **Angle DHA (°)** | **Angle HAY (°)** |
| --- | --- | --- | --- |
| **Garcinoxanthone T and JNK1** | | | |
| A:SER34:HN - :UNK1:O | 2.18378 | 130.121 | 98.227 |
| A:MET111:HN - :UNK1:O | 1.64765 | 162.072 | 116.627 |
| :UNK1:H - A:ASP169:OD2 | 2.28312 | 104.057 | 140.15 |
| :UNK1:H - A:GLU109:O | 2.01029 | 128.732 | 140.563 |
| :UNK1:H - A:MET111:O | 2.74296 | 111.699 | 96.06 |
| **Gentiseinand *C. acnes*****KAS III** | | | |
| :UNK1:H - B:SER162:O | 2.98502 | 132.62 | 156.711 |
| **2,4,6,3’,5’-pentahydroxybenzophenone and *C. acnes*****KAS III** | | | |
| B:ASN260:HD22 - :UNK1:O | 2.86414 | 99.746 | 112.187 |
| B:ARG262:HH21 - :UNK1:O | 2.21031 | 132.417 | 167.88 |
| **Mangostanaxanthone VI and *C. acnes* exo-β-1,4-mannosidase** | | | |
| A:HIS86:HE2 - :UNK1:O | 2.3753 | 162.643 | 94.861 |
| A:SER89:HN - :UNK1:O | 2.87677 | 104.01 | 108.288 |
| :UNK1:H - A:GLY150:O | 2.14212 | 141.837 | 161.516 |
